# Supplementary material for: Cyanide Content of Cassava Food Products Available in Australia
Source: MDPI journal article supplement (doi:10.3390/foods11101384), 2022-05-11
Supplement: s1 [file s1]

## Supplementary materials

**Table S1. Products tested for cyanide content, with details of the number of packets used in analyses, and the origin, mass and ingredients contained in the products.**

| Product           | No. of packets | Origin                                     | Mass (g) | Ingredients                                                                                                                                                                                                                                                                                                                                                                                                                                                                           |
|-------------------|----------------|--------------------------------------------|----------|---------------------------------------------------------------------------------------------------------------------------------------------------------------------------------------------------------------------------------------------------------------------------------------------------------------------------------------------------------------------------------------------------------------------------------------------------------------------------------------|
| RTE cassava chips | 3              | Malaysia                                   | 120      | <b>Cassava</b> , vegetable oil (palm oil), maltodextrin, salt, sugar, yeast extract and flavour enhancers (E631, E627, E363)                                                                                                                                                                                                                                                                                                                                                          |
| RTE cassava chips | 3              | Indonesia                                  | 180      | <b>Cassava</b> , palm oil (contains antioxidant TBHQ), sugar, grilled cheese, seasoning powder (contains MSG, disodium guanylate, disodium inosinate), salt                                                                                                                                                                                                                                                                                                                           |
| RTE tapioca chips | 3              | Singapore                                  | 100      | Prawn, <b>tapioca</b> , flour, palm oil, salt, MSG                                                                                                                                                                                                                                                                                                                                                                                                                                    |
| RTE tapioca chips | 3              | Singapore                                  | 70       | <b>Tapioca flour</b> , palm oleic oil, fresh prawns, wheat flour, sugar, bbq seasoning (sugar, maltodextrin, garlic, onion, chili, paprika, salt, natural flavors, flavor enhancer (E621, E627, E631), tomato, hydrolyzed vegetable protein, food acid E330, yeast extract, caramel coloring, silicon dioxide e551), salt, MSG                                                                                                                                                        |
| RTE tapioca chips | 3              | Philippines                                | 100      | Cornstarch, <b>tapioca starch</b> , vegetable oil, (may contain palm or coconut oil), sweet corn flavor (artificial and natural), MSG (E621), salt, sugar, whey powder, maltodextrin, silicon dioxide (E551), antioxidant (E319)                                                                                                                                                                                                                                                      |
| RTE tapioca chips | 3              | Philippines                                | 50       | Wheat, <b>tapioca starch</b> , vegetable oil (may consist of coconut oil and/or palm olein), corn starch, salt, sodium diacetate (E262ii), sugar, artificial flavors, MSG (E621) (as flavour enhancer), citric acid (W330), spices, sodium citrate (E331ii), fish sauce, hydrolysed soy protein, lactic acid (E270), FD&C yellow no. 5 (E102), disodium inosinate (E631), disodium guanylate (E627), tertiary butylhydroquinone (E319) antioxidant (added to oil to retard rancidity) |
| RTE tapioca chips | 3              | South Korea                                | 75       | <b>Tapioca flour</b> , palm oil, shrimp (13%), wheat flour (8%), sugar, salt, onion powder, garlic powder                                                                                                                                                                                                                                                                                                                                                                             |
| RTE cassava chips | 3              | Australia (local and imported ingredients) | 100      | <b>Cassava</b> (60%), <b>tapioca flour</b> , sunflower oil, sugar, shallot leaf, salt, sesame seeds                                                                                                                                                                                                                                                                                                                                                                                   |
| RTE cassava chips | 3              | Australia (local and imported ingredients) | 100      | <b>Cassava</b> , <b>tapioca starch</b> , sunflower oil, leek, chia seed, sugar, chili, basil seed, salt, galanghal, pepper, seasoning: 8% (maltodextrin: (maize), salt, rice flour, plant fibre, spices & spice extracts, sugar, acidity regulator (citric acid), vegetable extract, rosemary extract)                                                                                                                                                                                |
| Tapioca starch    | 3              | Thailand                                   | 500      | <b>Manioc</b> (88%), water (12%)                                                                                                                                                                                                                                                                                                                                                                                                                                                      |
| Tapioca starch    | 3              | Thailand                                   | 454      | <b>Tapioca</b> , water                                                                                                                                                                                                                                                                                                                                                                                                                                                                |

|                                |   |         |      |                       |
|--------------------------------|---|---------|------|-----------------------|
| Cassava roots - frozen, grated | 3 | Fiji    | 1000 | <b>Yellow cassava</b> |
| Cassava roots - frozen, grated | 3 | Fiji    | 1000 | <b>Cassava</b>        |
| Cassava roots - frozen, grated | 3 | Vietnam | 5000 | <b>Cassava</b>        |
| Cassava roots - frozen, whole  | 3 | India   | 1000 | <b>Tapioca</b>        |
| Cassava roots - frozen, whole  | 3 | Fiji    | 1000 | <b>Peeled cassava</b> |
| Cassava roots - frozen, whole  | 3 | Fiji    | 1000 | <b>Cassava</b>        |
| Cassava roots - frozen, whole  | 3 | Tonga   | 1000 | <b>Cassava</b>        |
| Cassava roots - frozen, whole  | 3 | Vietnam | 1000 | <b>Cassava</b>        |
| Cassava roots - frozen, whole  | 3 | Vietnam | 1000 | <b>Cassava</b>        |
